# Supplementary material for: National HIV prevalence estimates for sub-Saharan Africa: controlling selection bias with Heckman-type selection models
Source: HighWire-hosted journal article supplement (doi:10.1136/sextrans-2012-050636), 2012-11-20
Supplement: sextrans-2012-050636supp.pdf [file sextrans-2012-050636supp.pdf]

## Web Table A

The following tables present detailed HIV prevalence estimates for men and women from 12 DHS surveys. The ‘complete case’ analysis estimate (‘Valid HIV’) is reported in the first row for comparison to the imputation results that appear below. Prevalence estimates for those who refused consent and for those who could not be contacted were imputed with either conventional probit regressions (‘Imputed’) or Heckman-type selection models (‘Heckman’). The ‘total’ estimate combines the three categories for a national estimate of adult HIV prevalence. Estimates of the selection model correlation parameter  $\rho$  are reported in the final column. Prevalence estimates are survey weighted but sample sizes (N) are unweighted. P-values testing if the ‘selection variables’ (i.e., interviewer identities or a variable indicating whether or not a survey team contacted a household on the first day the team visited a cluster) were associated with participation are reported under each table.

## CotedIvoire2005

| Men                   | N    | Imputed              | Heckman              |                      |
|-----------------------|------|----------------------|----------------------|----------------------|
|                       |      | HIV (95% CI)         | HIV (95% CI)         | $\rho$ (95% CI)      |
| Valid HIV             | 3893 | 0.028 (0.021, 0.036) | 0.028 (0.021, 0.036) |                      |
| Predicted via consent | 588  | 0.034 (0.030, 0.051) | 0.163 (0.041, 0.403) | -0.59 (-0.86, -0.04) |
| Predicted via contact | 663  | 0.035 (0.028, 0.050) | 0.248 (0.034, 0.685) | -0.68 (-0.93, 0.02)  |
| Total                 | 5144 | 0.030 (0.024, 0.039) | 0.084 (0.035, 0.184) |                      |

Consent regression p-value for interviewers < 0.001.

Contact regression p-value for interviewers < 0.001.

Contact regression p-value for first day in cluster = 0.115.

| Women                 | N    | Imputed              | Heckman              |                     |
|-----------------------|------|----------------------|----------------------|---------------------|
|                       |      | HIV (95% CI)         | HIV (95% CI)         | $\rho$ (95% CI)     |
| Valid HIV             | 4535 | 0.061 (0.052, 0.071) | 0.061 (0.052, 0.071) |                     |
| Predicted via consent | 620  | 0.072 (0.062, 0.092) | 0.120 (0.019, 0.327) | -0.20 (-0.65, 0.36) |
| Predicted via contact | 611  | 0.079 (0.068, 0.097) | 0.097 (0.018, 0.264) | -0.08 (-0.52, 0.40) |
| Total                 | 5766 | 0.065 (0.057, 0.075) | 0.074 (0.050, 0.119) |                     |

Consent regression p-value for interviewers < 0.001.

Contact regression p-value for interviewers < 0.001.

Contact regression p-value for first day in cluster = 0.6.

## Ethiopia2005

| Men                   | N    | Imputed              | Heckman              |                     |
|-----------------------|------|----------------------|----------------------|---------------------|
|                       |      | HIV (95% CI)         | HIV (95% CI)         | $\rho$ (95% CI)     |
| Valid HIV             | 5118 | 0.009 (0.006, 0.012) | 0.009 (0.006, 0.012) |                     |
| Predicted via consent | 905  | 0.017 (0.014, 0.029) | 0.024 (0.000, 0.273) | -0.10 (-0.97, 0.95) |
| Predicted via contact | 749  | 0.013 (0.010, 0.020) | 0.107 (0.010, 0.453) | -0.66 (-0.93, 0.06) |
| Total                 | 6772 | 0.010 (0.007, 0.014) | 0.018 (0.008, 0.060) |                     |

Consent regression p-value for interviewers < 0.001.

Contact regression p-value for interviewers < 0.001.

Contact regression p-value for first day in cluster = 0.193.

| Women                 | N    | Imputed              | Heckman              |                     |
|-----------------------|------|----------------------|----------------------|---------------------|
|                       |      | HIV (95% CI)         | HIV (95% CI)         | $\rho$ (95% CI)     |
| Valid HIV             | 5953 | 0.017 (0.013, 0.022) | 0.017 (0.013, 0.022) |                     |
| Predicted via consent | 843  | 0.029 (0.025, 0.041) | 0.052 (0.003, 0.210) | -0.19 (-0.72, 0.48) |
| Predicted via contact | 345  | 0.027 (0.022, 0.037) | 0.021 (0.000, 0.141) | 0.08 (-0.65, 0.73)  |
| Total                 | 7141 | 0.018 (0.014, 0.024) | 0.020 (0.013, 0.037) |                     |

Consent regression p-value for interviewers < 0.001.

Contact regression p-value for interviewers < 0.001.

Contact regression p-value for first day in cluster = 0.237.

## Ghana2003

| Men                   | N    | Imputed              | Heckman              |                    |
|-----------------------|------|----------------------|----------------------|--------------------|
|                       |      | HIV (95% CI)         | HIV (95% CI)         | $\rho$ (95% CI)    |
| Valid HIV             | 4263 | 0.014 (0.011, 0.019) | 0.014 (0.011, 0.019) |                    |
| Predicted via consent | 753  | 0.016 (0.015, 0.029) | 0.000 (0.000, 0.083) | 0.69 (-0.88, 1.00) |
| Predicted via contact | 321  | 0.014 (0.011, 0.023) | 0.001 (0.000, 0.027) | 0.48 (-0.28, 0.87) |
| Total                 | 5337 | 0.015 (0.011, 0.020) | 0.011 (0.009, 0.025) |                    |

Consent regression p-value for interviewers < 0.001.

Contact regression p-value for interviewers < 0.001.

Contact regression p-value for first day in cluster = 0.865.

| Women                 | N    | Imputed              | Heckman              |                     |
|-----------------------|------|----------------------|----------------------|---------------------|
|                       |      | HIV (95% CI)         | HIV (95% CI)         | $\rho$ (95% CI)     |
| Valid HIV             | 5285 | 0.023 (0.019, 0.028) | 0.023 (0.019, 0.028) |                     |
| Predicted via consent | 410  | 0.028 (0.025, 0.039) | 0.446 (0.008, 0.934) | -0.86 (-1.00, 0.32) |
| Predicted via contact | 251  | 0.021 (0.018, 0.029) | 0.041 (0.000, 0.460) | -0.16 (-0.94, 0.89) |
| Total                 | 5946 | 0.024 (0.020, 0.028) | 0.053 (0.021, 0.097) |                     |

Consent regression p-value for interviewers < 0.001.

Contact regression p-value for interviewers < 0.001.

Contact regression p-value for first day in cluster = 0.9.

## Lesotho2004

| Men                   | N    | Imputed              | Heckman              |                     |
|-----------------------|------|----------------------|----------------------|---------------------|
|                       |      | HIV (95% CI)         | HIV (95% CI)         | $\rho$ (95% CI)     |
| Valid HIV             | 2246 | 0.188 (0.170, 0.208) | 0.188 (0.170, 0.208) |                     |
| Predicted via consent | 553  | 0.205 (0.182, 0.239) | 0.243 (0.064, 0.498) | -0.10 (-0.59, 0.45) |
| Predicted via contact | 504  | 0.200 (0.180, 0.225) | 0.145 (0.001, 0.615) | 0.15 (-0.79, 0.88)  |
| Total                 | 3303 | 0.193 (0.175, 0.213) | 0.191 (0.136, 0.297) |                     |

Consent regression p-value for interviewers < 0.001.

Contact regression p-value for interviewers < 0.001.

Contact regression p-value for first day in cluster = 0.966.

| Women                 | N    | Imputed              | Heckman              |                     |
|-----------------------|------|----------------------|----------------------|---------------------|
|                       |      | HIV (95% CI)         | HIV (95% CI)         | $\rho$ (95% CI)     |
| Valid HIV             | 3032 | 0.260 (0.242, 0.278) | 0.260 (0.242, 0.278) |                     |
| Predicted via consent | 514  | 0.269 (0.248, 0.295) | 0.283 (0.096, 0.537) | -0.03 (-0.50, 0.45) |
| Predicted via contact | 212  | 0.258 (0.239, 0.280) | 0.314 (0.080, 0.629) | -0.11 (-0.58, 0.43) |
| Total                 | 3758 | 0.261 (0.244, 0.279) | 0.266 (0.225, 0.320) |                     |

Consent regression p-value for interviewers < 0.001.

Contact regression p-value for interviewers < 0.001.

Contact regression p-value for first day in cluster = 0.707.

## Liberia2007

| Men                   | N    | Imputed              | Heckman              |                     |
|-----------------------|------|----------------------|----------------------|---------------------|
|                       |      | HIV (95% CI)         | HIV (95% CI)         | $\rho$ (95% CI)     |
| Valid HIV             | 5241 | 0.012 (0.009, 0.015) | 0.012 (0.009, 0.015) |                     |
| Predicted via consent | 768  | 0.014 (0.014, 0.024) | 0.018 (0.001, 0.091) | -0.06 (-0.56, 0.48) |
| Predicted via contact | 461  | 0.013 (0.011, 0.019) | 0.011 (0.000, 0.071) | 0.05 (-0.52, 0.59)  |
| Total                 | 6470 | 0.012 (0.010, 0.016) | 0.012 (0.009, 0.023) |                     |

Consent regression p-value for interviewers < 0.001.

Contact regression p-value for interviewers < 0.001.

Contact regression p-value for first day in cluster = 0.581.

| Women                 | N    | Imputed              | Heckman              |                     |
|-----------------------|------|----------------------|----------------------|---------------------|
|                       |      | HIV (95% CI)         | HIV (95% CI)         | $\rho$ (95% CI)     |
| Valid HIV             | 6533 | 0.019 (0.016, 0.023) | 0.019 (0.016, 0.023) |                     |
| Predicted via consent | 561  | 0.023 (0.021, 0.031) | 0.074 (0.010, 0.237) | -0.34 (-0.72, 0.20) |
| Predicted via contact | 351  | 0.022 (0.019, 0.028) | 0.047 (0.004, 0.169) | -0.21 (-0.65, 0.34) |
| Total                 | 7445 | 0.019 (0.016, 0.023) | 0.024 (0.017, 0.038) |                     |

Consent regression p-value for interviewers < 0.001.

Contact regression p-value for interviewers < 0.001.

Contact regression p-value for first day in cluster = 0.098.

## Malawi2004

| Men                   | N    | Imputed              | Heckman              |                    |
|-----------------------|------|----------------------|----------------------|--------------------|
|                       |      | HIV (95% CI)         | HIV (95% CI)         | $\rho$ (95% CI)    |
| Valid HIV             | 2404 | 0.100 (0.087, 0.116) | 0.100 (0.087, 0.116) |                    |
| Predicted via consent | 837  | 0.098 (0.086, 0.128) | 0.071 (0.001, 0.341) | 0.14 (-0.74, 0.84) |
| Predicted via contact | 553  | 0.119 (0.105, 0.143) | 0.024 (0.000, 0.183) | 0.53 (-0.37, 0.92) |
| Total                 | 3794 | 0.102 (0.090, 0.120) | 0.082 (0.058, 0.161) |                    |

Consent regression p-value for interviewers < 0.001.

Contact regression p-value for interviewers < 0.001.

Contact regression p-value for first day in cluster = 0.205.

| Women                 | N    | Imputed              | Heckman              |                     |
|-----------------------|------|----------------------|----------------------|---------------------|
|                       |      | HIV (95% CI)         | HIV (95% CI)         | $\rho$ (95% CI)     |
| Valid HIV             | 2864 | 0.139 (0.126, 0.153) | 0.139 (0.126, 0.153) |                     |
| Predicted via consent | 975  | 0.111 (0.102, 0.137) | 0.254 (0.050, 0.598) | -0.41 (-0.83, 0.31) |
| Predicted via contact | 231  | 0.129 (0.118, 0.148) | 0.152 (0.019, 0.428) | -0.08 (-0.64, 0.55) |
| Total                 | 4070 | 0.131 (0.120, 0.147) | 0.170 (0.109, 0.272) |                     |

Consent regression p-value for interviewers < 0.001.

Contact regression p-value for interviewers < 0.001.

Contact regression p-value for first day in cluster = 0.799.

## Mali2006

| Men                   | N    | Imputed              | Heckman              |                      |
|-----------------------|------|----------------------|----------------------|----------------------|
|                       |      | HIV (95% CI)         | HIV (95% CI)         | $\rho$ (95% CI)      |
| Valid HIV             | 3946 | 0.011 (0.007, 0.016) | 0.011 (0.007, 0.016) |                      |
| Predicted via consent | 303  | 0.012 (0.011, 0.026) | 0.032 (0.000, 0.342) | -0.26 (-0.93, 0.82)  |
| Predicted via contact | 384  | 0.011 (0.009, 0.022) | 0.177 (0.053, 0.442) | -0.76 (-0.92, -0.41) |
| Total                 | 4633 | 0.011 (0.007, 0.016) | 0.027 (0.014, 0.065) |                      |

Consent regression p-value for interviewers < 0.001.

Contact regression p-value for interviewers < 0.001.

Contact regression p-value for first day in cluster = 0.946.

| Women                 | N    | Imputed              | Heckman              |                     |
|-----------------------|------|----------------------|----------------------|---------------------|
|                       |      | HIV (95% CI)         | HIV (95% CI)         | $\rho$ (95% CI)     |
| Valid HIV             | 4804 | 0.015 (0.011, 0.021) | 0.015 (0.011, 0.021) |                     |
| Predicted via consent | 225  | 0.017 (0.014, 0.028) | 0.366 (0.000, 0.990) | -0.86 (-1.00, 0.96) |
| Predicted via contact | 124  | 0.016 (0.013, 0.024) | 0.184 (0.015, 0.539) | -0.67 (-0.93, 0.00) |
| Total                 | 5153 | 0.015 (0.011, 0.020) | 0.035 (0.013, 0.069) |                     |

Consent regression p-value for interviewers = 0.002.

Contact regression p-value for interviewers < 0.001.

Contact regression p-value for first day in cluster = 0.114.

## Rwanda2005

| Men                   | N    | Imputed              | Heckman              |                     |
|-----------------------|------|----------------------|----------------------|---------------------|
|                       |      | HIV (95% CI)         | HIV (95% CI)         | $\rho$ (95% CI)     |
| Valid HIV             | 4742 | 0.022 (0.018, 0.027) | 0.022 (0.018, 0.027) |                     |
| Predicted via consent | 90   | 0.034 (0.028, 0.052) | 0.138 (0.000, 0.811) | -0.46 (-1.00, 0.98) |
| Predicted via contact | 122  | 0.031 (0.026, 0.042) | 0.010 (0.000, 0.403) | 0.24 (-0.97, 0.99)  |
| Total                 | 4954 | 0.022 (0.018, 0.027) | 0.024 (0.018, 0.043) |                     |

Consent regression p-value for interviewers < 0.001.

Contact regression p-value for interviewers = 0.043.

Contact regression p-value for first day in cluster = 0.847.

| Women                 | N    | Imputed              | Heckman              |                     |
|-----------------------|------|----------------------|----------------------|---------------------|
|                       |      | HIV (95% CI)         | HIV (95% CI)         | $\rho$ (95% CI)     |
| Valid HIV             | 5677 | 0.036 (0.031, 0.041) | 0.036 (0.031, 0.041) |                     |
| Predicted via consent | 65   | 0.055 (0.047, 0.069) | 0.268 (0.002, 0.784) | -0.58 (-0.98, 0.80) |
| Predicted via contact | 93   | 0.039 (0.034, 0.047) | 0.209 (0.000, 0.840) | -0.54 (-0.99, 0.89) |
| Total                 | 5835 | 0.036 (0.031, 0.041) | 0.042 (0.032, 0.058) |                     |

Consent regression p-value for interviewers < 0.001.

Contact regression p-value for interviewers < 0.001.

Contact regression p-value for first day in cluster = 0.546.

## Senegal2005

| Men                   | N    | Imputed              | Heckman              |                     |
|-----------------------|------|----------------------|----------------------|---------------------|
|                       |      | HIV (95% CI)         | HIV (95% CI)         | $\rho$ (95% CI)     |
| Valid HIV             | 3303 | 0.005 (0.003, 0.008) | 0.005 (0.003, 0.008) |                     |
| Predicted via consent | 487  | 0.005 (0.004, 0.016) | 0.035 (0.003, 0.193) | -0.52 (-0.86, 0.12) |
| Predicted via contact | 564  | 0.005 (0.003, 0.012) | 0.014 (0.000, 0.157) | -0.28 (-0.84, 0.57) |
| Total                 | 4354 | 0.005 (0.003, 0.008) | 0.009 (0.003, 0.040) |                     |

Consent regression p-value for interviewers < 0.001.

Contact regression p-value for interviewers < 0.001.

Contact regression p-value for first day in cluster = 0.127.

| Women                 | N    | Imputed              | Heckman              |                     |
|-----------------------|------|----------------------|----------------------|---------------------|
|                       |      | HIV (95% CI)         | HIV (95% CI)         | $\rho$ (95% CI)     |
| Valid HIV             | 4520 | 0.009 (0.007, 0.013) | 0.009 (0.007, 0.013) |                     |
| Predicted via consent | 577  | 0.008 (0.007, 0.016) | 0.052 (0.003, 0.252) | -0.52 (-0.87, 0.18) |
| Predicted via contact | 245  | 0.010 (0.007, 0.020) | 0.033 (0.001, 0.218) | -0.31 (-0.80, 0.42) |
| Total                 | 5342 | 0.009 (0.007, 0.013) | 0.015 (0.008, 0.041) |                     |

Consent regression p-value for interviewers < 0.001.

Contact regression p-value for interviewers < 0.001.

Contact regression p-value for first day in cluster = 0.333.

## Swaziland2006-7

| Men                   | N    | Imputed              | Heckman              |                     |
|-----------------------|------|----------------------|----------------------|---------------------|
|                       |      | HIV (95% CI)         | HIV (95% CI)         | $\rho$ (95% CI)     |
| Valid HIV             | 3630 | 0.195 (0.178, 0.212) | 0.195 (0.178, 0.212) |                     |
| Predicted via consent | 526  | 0.229 (0.215, 0.248) | 0.669 (0.133, 0.964) | -0.73 (-0.98, 0.34) |
| Predicted via contact | 509  | 0.228 (0.212, 0.247) | 0.447 (0.001, 0.989) | -0.42 (-0.98, 0.91) |
| Total                 | 4665 | 0.202 (0.186, 0.218) | 0.274 (0.173, 0.364) |                     |

Consent regression p-value for interviewers = 0.069.

Contact regression p-value for interviewers = 0.037.

Contact regression p-value for first day in cluster = 0.383.

| Women                 | N    | Imputed              | Heckman              |                     |
|-----------------------|------|----------------------|----------------------|---------------------|
|                       |      | HIV (95% CI)         | HIV (95% CI)         | $\rho$ (95% CI)     |
| Valid HIV             | 4624 | 0.309 (0.292, 0.326) | 0.309 (0.292, 0.326) |                     |
| Predicted via consent | 383  | 0.294 (0.279, 0.313) | 0.057 (0.000, 0.923) | 0.54 (-1.00, 1.00)  |
| Predicted via contact | 283  | 0.327 (0.310, 0.344) | 0.343 (0.001, 0.942) | -0.03 (-0.90, 0.89) |
| Total                 | 5290 | 0.309 (0.292, 0.325) | 0.293 (0.262, 0.388) |                     |

Consent regression p-value for interviewers = 0.163.

Contact regression p-value for interviewers = 0.033.

Contact regression p-value for first day in cluster = 0.801.

## Zambia2007

| Men                   | N    | Imputed              | Heckman              |                      |
|-----------------------|------|----------------------|----------------------|----------------------|
|                       |      | HIV (95% CI)         | HIV (95% CI)         | $\rho$ (95% CI)      |
| Valid HIV             | 5163 | 0.121 (0.110, 0.133) | 0.121 (0.110, 0.133) |                      |
| Predicted via consent | 1318 | 0.117 (0.110, 0.131) | 0.520 (0.219, 0.825) | -0.75 (-0.94, -0.23) |
| Predicted via contact | 653  | 0.153 (0.141, 0.167) | 0.248 (0.014, 0.697) | -0.24 (-0.83, 0.60)  |
| Total                 | 7134 | 0.123 (0.114, 0.134) | 0.210 (0.137, 0.297) |                      |

Consent regression p-value for interviewers < 0.001.

Contact regression p-value for interviewers < 0.001.

Contact regression p-value for first day in cluster = 0.236.

| Women                 | N    | Imputed              | Heckman              |                     |
|-----------------------|------|----------------------|----------------------|---------------------|
|                       |      | HIV (95% CI)         | HIV (95% CI)         | $\rho$ (95% CI)     |
| Valid HIV             | 5713 | 0.159 (0.145, 0.173) | 0.159 (0.145, 0.173) |                     |
| Predicted via consent | 1400 | 0.158 (0.148, 0.173) | 0.245 (0.075, 0.501) | -0.22 (-0.65, 0.30) |
| Predicted via contact | 283  | 0.172 (0.158, 0.188) | 0.172 (0.013, 0.514) | 0.00 (-0.64, 0.64)  |
| Total                 | 7396 | 0.159 (0.147, 0.172) | 0.176 (0.137, 0.235) |                     |

Consent regression p-value for interviewers < 0.001.

Contact regression p-value for interviewers < 0.001.

Contact regression p-value for first day in cluster < 0.001.

## Zimbabwe2005-6

| Men                   | N    | Imputed              | Heckman              |                     |
|-----------------------|------|----------------------|----------------------|---------------------|
|                       |      | HIV (95% CI)         | HIV (95% CI)         | $\rho$ (95% CI)     |
| Valid HIV             | 5555 | 0.145 (0.133, 0.158) | 0.145 (0.133, 0.158) |                     |
| Predicted via consent | 1604 | 0.153 (0.142, 0.169) | 0.197 (0.053, 0.420) | -0.12 (-0.57, 0.37) |
| Predicted via contact | 1585 | 0.172 (0.158, 0.188) | 0.193 (0.014, 0.558) | -0.06 (-0.69, 0.63) |
| Total                 | 8744 | 0.151 (0.141, 0.164) | 0.163 (0.109, 0.253) |                     |

Consent regression p-value for interviewers < 0.001.

Contact regression p-value for interviewers < 0.001.

Contact regression p-value for first day in cluster = 0.118.

| Women                 | N    | Imputed              | Heckman              |                     |
|-----------------------|------|----------------------|----------------------|---------------------|
|                       |      | HIV (95% CI)         | HIV (95% CI)         | $\rho$ (95% CI)     |
| Valid HIV             | 7494 | 0.213 (0.200, 0.226) | 0.213 (0.200, 0.226) |                     |
| Predicted via consent | 1390 | 0.203 (0.194, 0.214) | 0.333 (0.062, 0.677) | -0.27 (-0.76, 0.41) |
| Predicted via contact | 970  | 0.212 (0.202, 0.224) | 0.119 (0.000, 0.840) | 0.24 (-0.93, 0.97)  |
| Total                 | 9854 | 0.211 (0.200, 0.223) | 0.221 (0.170, 0.327) |                     |

Consent regression p-value for interviewers < 0.001.

Contact regression p-value for interviewers < 0.001.

Contact regression p-value for first day in cluster = 0.817.
